# Supplementary material for: Influence of oil and gas emissions on ambient atmospheric non-methane hydrocarbons in residential areas of Northeastern Colorado
Source: Oxford University Press journal article supplement (doi:10.12952/journal.elementa.000035), 2014-01-01
Supplement: elementa_000035_s001.docx [file elementa_000035_s001.docx]

Table S1. Descriptions of canister samples used in this study.

| *Sample Number* | *Location* | *Start Time* | *Sample Type* |
| --- | --- | --- | --- |
| 1 | Longmont | 3/20/13 17:30 | 24-hr |
| 2 | Longmont | 3/20/13 18:03 | 24-hr |
| 3 | East Erie | 3/26/13 17:25 | 24-hr |
| 4 | West Erie | 3/26/13 16:50 | 24-hr |
| 5 | East Erie | 3/26/13 16:33 | 24-hr |
| 6 | East Erie | 3/26/13 17:15 | 24-hr |
| 7 | Longmont | 3/26/13 16:15 | 24-hr |
| 8 | West Erie | 4/3/13 13:20 | 24-hr |
| 9 | Longmont | 4/3/13 13:35 | 24-hr |
| 10 | West Erie | 4/21/13 0:00 | 3-hr |
| 11 | West Erie | 4/18/13 19:00 | 3-hr |
| 12 | West Erie | 4/10/13 8:42 | 5 min |
| 13 | East Erie | 4/10/13 9:00 | 5 min |
| 14 | Longmont | 4/10/13 9:23 | 5 min |
| 15 | East Erie | 4/10/13 18:25 | 5 min |
| 16 | East Erie | 4/10/13 18:40 | 5 min |
| 17 | West Erie | 5/10/13 9:30 | 24-hr |
| 18 | East Erie | 5/10/13 9:40 | 24-hr |
| 19 | East Erie | 5/10/13 9:45 | 24-hr |
| 20 | Longmont | 5/10/13 10:40 | 24-hr |
| 21 | West Erie | 5/15/13 12:00 | 24-hr |
| 22 | East Erie | 5/15/13 12:15 | 24-hr |
| 23 | East Erie | 5/15/13 12:40 | 24-hr |
| 24 | East Erie | 5/26/13 14:00 | 3-hr |
| 25 | West Erie | 6/5/13 10:41 | 24-hr |
| 26 | West Erie | 6/5/13 10:41 | 3-hr |
| 27 | Longmont | 6/5/13 11:00 | 24-hr |
| 28 | Longmont | 6/5/13 11:00 | 3-hr |
| 29 | East Erie | 6/5/13 11:15 | 24-hr |
| 30 | West Erie | 6/5/13 18:15 | 3-hr |
