# Supplementary material for: Influence of oil and gas emissions on ambient atmospheric non-methane hydrocarbons in residential areas of Northeastern Colorado
Source: Oxford University Press journal article supplement (doi:10.12952/journal.elementa.000035), 2014-01-01
Supplement: elementa_000035_s002.docx [file elementa_000035_s002.docx]

Table S2. NMHC quantified according to compound class from whole air samples collected by the Colorado Department of Public Health and Environment in Denver and Platteville, 2013.

| *Alkanes* | *Alkenes* | *Aromatics* | *Other* |
| --- | --- | --- | --- |
| Ethane | 1,3-Butadiene | 1,2,3-Trimethylbenzene | 2,2,3-Trimethylpentane |
| Isobutane | 1-Decene | 1,2,4-Trimethylbenzene | 2,2,4-Trimethylpentane |
| Isopentane | 1-Dodecene | 1,3,5-Trimethylbenzene | 2,2-Dimethylbutane |
| n-Butane | 1-Heptene | Benzene | 2,3,4-Trimethylpentane |
| n-Decane | 1-Hexene | Ethylbenzene | 2,3-Dimethylbutane |
| n-Dodecane | 1-Nonene | Isopropylbenzene | 2,3-Dimethylpentane |
| n-Heptane | 1-Octene | m-Diethylbenzene | 2,4-Dimethylpentane |
| n-Hexane | 1-Pentene | m-Ethyltoluene | 2-Methylheptane |
| n-Nonane | 1-Tridecene | m-Xylene/p-Xylene | 2-Methylhexane |
| n-Octane | 1-Undecene | n-Propylbenzene | 2-Methylpentane |
| n-Pentane | 2-Ethyl-1-butene | o-Ethyltoluene | 3-Methylheptane |
| n-Tridecane | 2-Methyl-1-butene | o-Xylene | 3-Methylhexane |
| n-Undecane | 2-Methyl-1-pentene | p-Diethylbenzene | 3-Methylpentane |
| Propane | 2-Methyl-2-butene | p-Ethyltoluene | Acetylene |
|  | 3-Methyl-1-butene | Styrene | a-Pinene |
|  | 4-Methyl-1-pentene | Toluene | b-Pinene |
|  | cis-2-Butene |  | Cyclohexane |
|  | cis-2-Hexene |  | Cyclopentane |
|  | cis-2-Pentene |  | Isoprene |
|  | Cyclopentene |  | Methylcyclohexane |
|  | Ethylene |  | Methylcyclopentane |
|  | Isobutene/1-Butene |  | Propyne |
|  | Propylene |  |  |
|  | trans-2-Butene |  |  |
|  | trans-2-Hexene |  |  |
|  | trans-2-Pentene |  |  |
