# Supplementary material for: Influence of oil and gas emissions on ambient atmospheric non-methane hydrocarbons in residential areas of Northeastern Colorado
Source: Oxford University Press journal article supplement (doi:10.12952/journal.elementa.000035), 2014-01-01
Supplement: elementa_000035_s004.docx [file elementa_000035_s004.docx]

Table S4. Mean values and 1-sigma standard deviations for the entire year, March – May, and June – July of 2013 for Platteville and Denver

|  | *Platteville* | | |  | *Denver* | | |
| --- | --- | --- | --- | --- | --- | --- | --- |
| *Compound* | *Year* | *March-May* | *June-July* |  | *Year* | *March-May* | *June-July* |
| Ethane | 135 ± 121 | 131 ± 165 | 61.2 ± 34.4 |  | 14.5 ± 11.4 | 13.3 ± 5.74 | 8.77 ± 2.45 |
| Propane | 103 ± 88.2 | 97.2 ± 127 | 54.0 ± 31.8 |  | 7.00 ± 5.50 | 7.44 ± 5.15 | 4.41 ± 2.14 |
| i-Butane | 21.4 ± 18.6 | 21.5 ± 27.3 | 11.2 ± 7.10 |  | 1.40 ± 1.10 | 1.42 ± 0.951 | 0.802 ± 0.412 |
| n-Butane | 50.6 ± 44.1 | 51.4 ± 66.3 | 28.4 ± 17.6 |  | 3.39 ± 2.76 | 3.40 ± 2.40 | 1.94 ± 1.04 |
| i-Pentane | 17.6 ± 13.9 | 16.9 ± 19.2 | 11.7 ± 8.45 |  | 1.57 ± 1.56 | 2.15 ± 1.09 | 1.89 ± 2.04 |
| n-Pentane | 17.0 ± 14.8 | 17.2 ± 22.4 | 10.4 ± 6.18 |  | 1.61 ± 1.01 | 1.50 ± 0.933 | 1.43 ± 0.625 |
| Benzene | 0.695 ± 0.619 | 0.513 ± 0.724 | 0.188 ± 0.348 |  | 0.412 ± 0.271 | 0.393 ± 0.145 | 0.098 ± 0.145 |
| Toluene | 1.25 ± 0.713 | 1.06 ± 0.746 | 0.914 ± 0.535 |  | 1.24 ± 0.682 | 1.01 ± 0.487 | 1.19 ± 0.515 |
| Ethylbenzene | 0.120 ± 0.425 | 0.084 ± 0.072 | 0.077 ± 0.064 |  | 0.166 ± 0.096 | 0.140 ± 0.063 | 0.151 ± 0.052 |
| Xylenes | 0.678 ± 0427 | 0.520 ± 0.299 | 0.443 ± 0.315 |  | 0.754 ± 0.318 | 0.625 ± 0.196 | 0.655 ± 0.196 |
| Acetylene | 1.54 ± 1.30 | 0.928 ± 0.589 | 0.596 ± 0.423 |  | 2.37 ± 2.02 | 1.75 ± 0.875 | 1.26 ± 0.398 |
| Ethene | 3.14 ± 1.96 | 2.06 ± 1.17 | 1.91 ± 0.719 |  | 3.69 ± 2.60 | 2.66 ± 1.03 | 2.61 ± 0.395 |
| Propene | 0.727 ± 0.431 | 0.540 ± 0.314 | 0.437 ± 0.204 |  | 0.798 ± 0.496 | 0.601 ± 0.227 | 0.589 ± 0.137 |
| Trans-2-butene | 0.122 ± 0.089 | 0.085 ± 0.075 | 0.069 ± 0.025 |  | 0.101 ± 0.078 | 0.066 ± 0.026 | 0.084 ± 0.019 |
