# Supplementary material for: Influence of oil and gas emissions on ambient atmospheric non-methane hydrocarbons in residential areas of Northeastern Colorado
Source: Oxford University Press journal article supplement (doi:10.12952/journal.elementa.000035), 2014-01-01
Supplement: elementa_000035_s005.docx [file elementa_000035_s005.docx]

Table S5. June – July means and 1-sigma standard deviations comparing 2012 and 2013 for Platteville and Denver.

|  | *Platteville* | | |  | *Denver* | | |
| --- | --- | --- | --- | --- | --- | --- | --- |
| *Compound* | *2012* | *2013* | *% Change* |  | *2012* | *2013* | *% Change* |
| Ethane | 91.3 ± 65.4 | 61.2 ± 34.4 | -32.9 |  | 10.9 ± 5.78 | 8.77 ± 2.45 | -19.2 |
| Propane | 80.4 ± 59.1 | 54.0 ± 31.8 | -32.8 |  | 6.28 ± 4.74 | 4.41 ± 2.14 | -29.8 |
| i-Butane | 16.8 ± 12.7 | 11.2 ± 7.10 | -33.3 |  | 1.24 ± 0.946 | 0.802 ± 0.412 | -35.4 |
| n-Butane | 41.6 ± 31.0 | 28.4 ± 17.6 | -31.8 |  | 3.06 ± 2.39 | 1.94 ± 1.04 | -36.7 |
| i-Pentane | 17.5 ± 11.7 | 11.7 ± 8.45 | -33.2 |  | 2.41 ± 2.37 | 1.89 ± 2.04 | -21.7 |
| n-Pentane | 15.7 ± 11.8 | 10.4 ± 6.18 | -33.9 |  | 1.89 ± 1.30 | 1.43 ± 0.625 | -24.1 |
| Benzene | 0.392 ± 0.936 | 0.188 ± 0.348 | -52.1 |  | 0.136 ± 0.234 | 0.098 ± 0.145 | -27.8 |
| Toluene | 1.55 ± 2.13 | 0.914 ± 0.535 | -41.0 |  | 0.836 ± 0.379 | 1.19 ± 0.515 | +42.8 |
| Ethylbenzene | 0.095 ± 0.071 | 0.077 ± 0.064 | -18.5 |  | 0.109 ± 0.049 | 0.151 ± 0.052 | +38.7 |
| Xylenes | 0.459 ± 0.365 | 0.443 ± 0.315 | -3.53 |  | 0.466 ± 0.209 | 0.655 ± 0.196 | +41.1 |
| Acetylene | 0.479 ± 0.291 | 0.596 ± 0.423 | +24.6 |  | 1.37 ± 1.21 | 1.26 ± 0.398 | -7.91 |
| Ethene | 2.40 ± 0.943 | 1.91 ± 0.719 | -20.2 |  | 3.36 ± 1.24 | 2.61 ± 0.395 | -22.2 |
| Propene | 0.515 ± 0.252 | 0.437 ± 0.204 | -15.2 |  | 0.652 ± 0.269 | 0.589 ± 0.137 | -9.75 |
| Trans-2-butene | 0.062 ± 0.038 | 0.069 ± 0.025 | +12.2 |  | 0.077 ± 0.048 | 0.084 ± 0.019 | +8.12 |
